# Supplementary material for: A tandem segmentation-classification approach for the localization of morphological predictors of C. elegans lifespan and motility
Source: publisher site journal article supplement (doi:10.18632/aging.203916), 2022-02-25
Supplement: Supplementary file [file aging-v14i4-203916-supplementary-material-SD1.pdf]

## SUPPLEMENTARY FIGURE

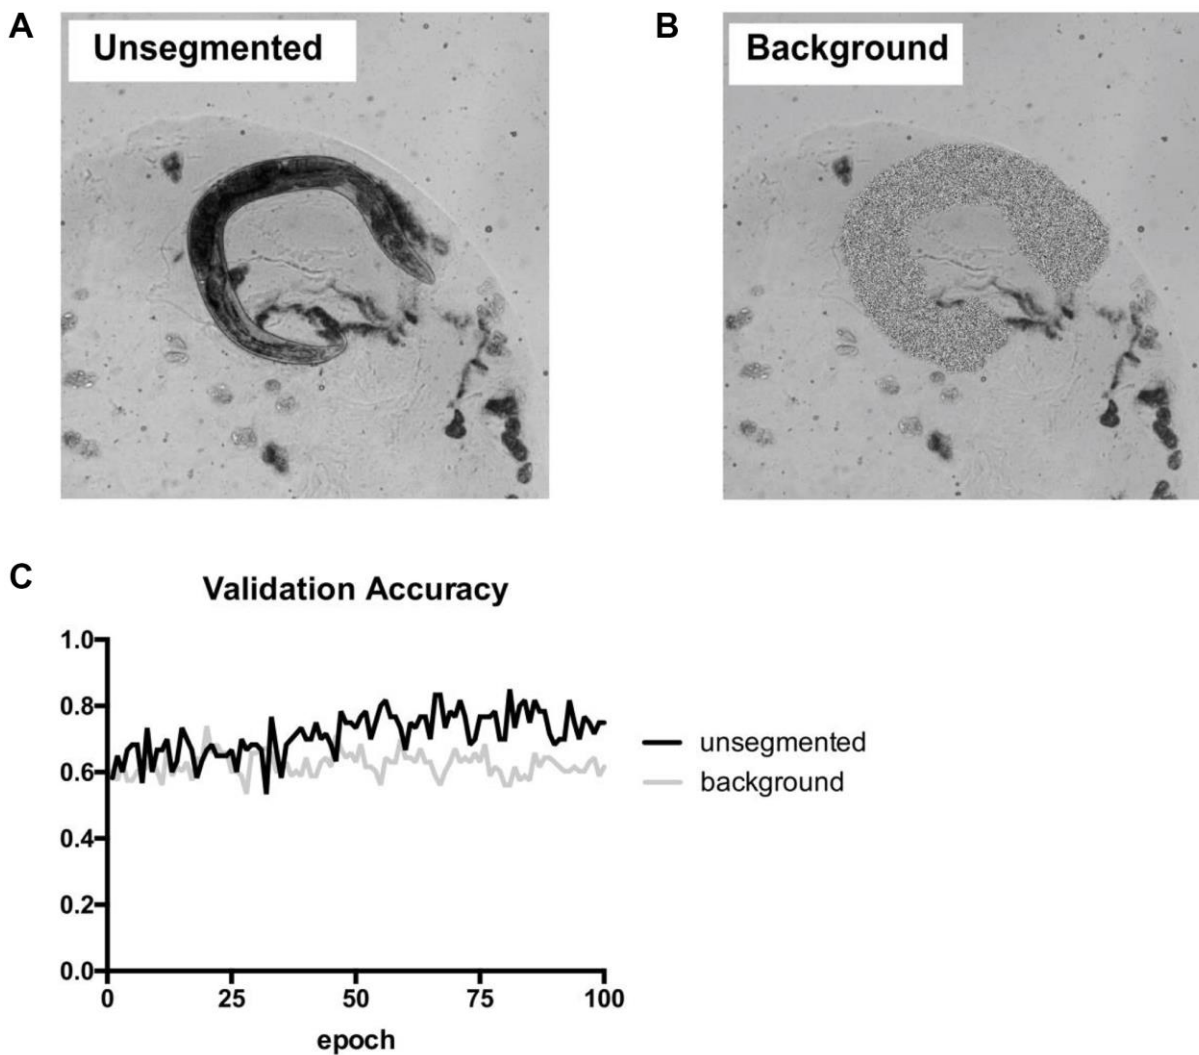

**Supplementary Figure 1. Background contribution investigation.** (A) Example of a raw (unsegmented) *C. elegans* micrograph. (B) Example of a micrograph with segmented *C. elegans* removed and substituted by a random noise – i.e., synthetic background. (C) Comparison of WormNet performance on an unseen validation dataset of unsegmented images (black) and synthetic background (grey).
